# Supplementary material for: The Effects of Photobioreactor Type on Biomass and Lipid Production of the Green Microalga Monoraphidium pusillum in Laboratory Scale
Source: MDPI journal article supplement (doi:10.3390/app12042196), 2022-02-20
Supplement: s1 [file s1]

Archive with 1 entries (1 files):
- applsci-1583254-supplementary.pdf
