# Supplementary material for: The Effects of Photobioreactor Type on Biomass and Lipid Production of the Green Microalga Monoraphidium pusillum in Laboratory Scale
Source: MDPI journal article supplement (doi:10.3390/app12042196), 2022-02-20
Supplement: s1 [file s1 › applsci-1583254-supplementary.pdf]

# Supplementary Materials: The Effects of Photobioreactor Type on Biomass and Lipid Production of the Green Microalga *Monoraphidium pusillum* in Laboratory Scale

István Bácsi <sup>1,\*</sup>, Fruzsina Tóthfalusi <sup>2</sup>, Kamilla Márton <sup>1</sup>, Viktória B-Béres <sup>3</sup> and Sándor Gonda <sup>4</sup>

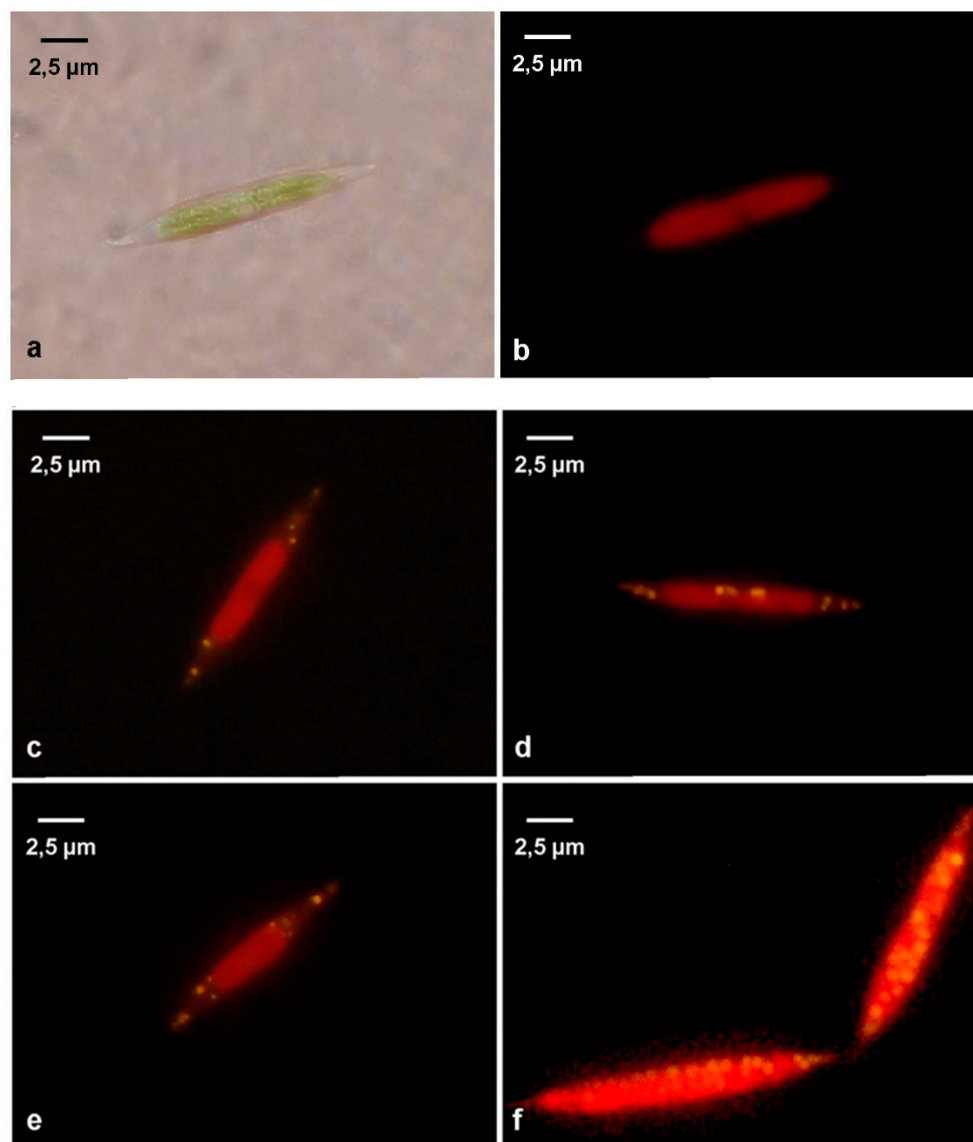

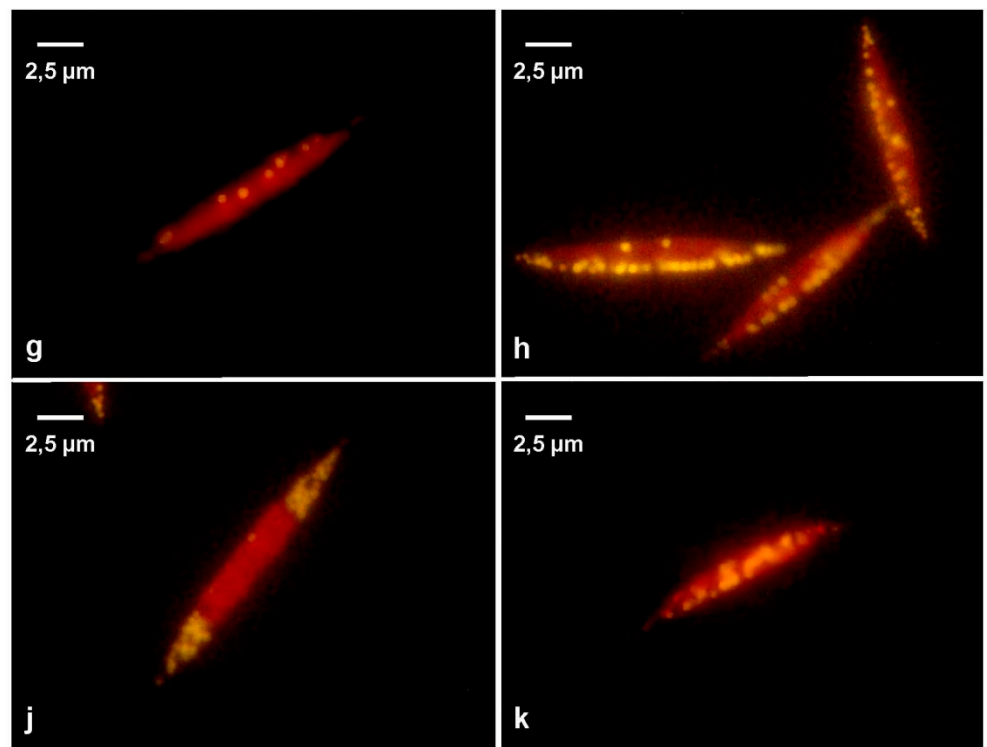

**Figure S1.** *Monoraphidium pusillum* cells (a) in inoculum, without staining; (b) in inoculum, with Nile red fluorescent staining; further photographs were taken on the 3<sup>rd</sup> and the 7<sup>th</sup> day with Nile red fluorescent staining (c,d) in control cultures; e,f) in 75% nitrate containing cultures; (g,h) in 50% nitrate containing cultures and (j,k) in 25% nitrate containing cultures. Golden yellow spots represent neutral lipid drops.

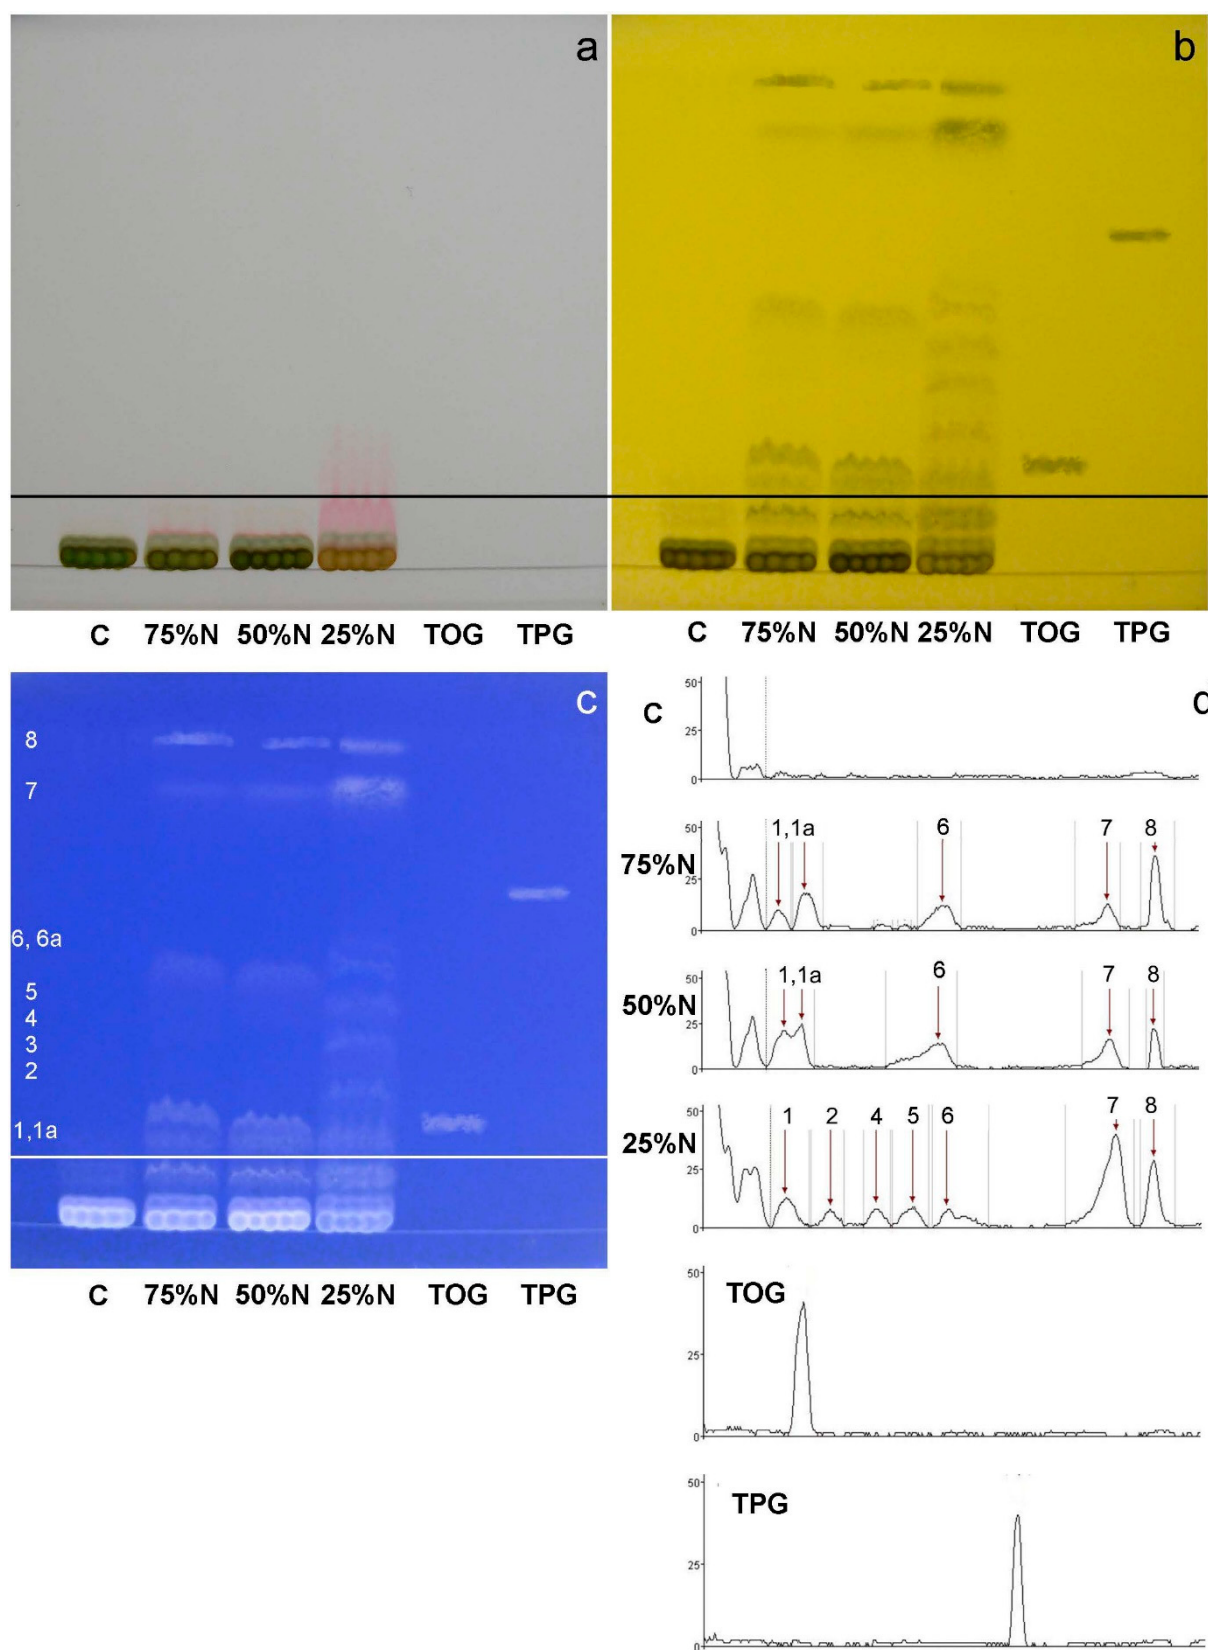

**Figure S2.** Preliminary analysis of the lipid content of *Monoraphidium pusillum* control (C) and nitrate depleted (75–25% N) cultures from the hybrid reactor by thin layer chromatography. (a) the TLC plate after the run; (b) the TLC plate after development; (c) the negative image of the developed TLC plate created for pattern analysis; (d) the peaks found by using CpAtlas 2.0 software. 1–8: the separated bands (peaks); TOG: trioleil glycerol and TPG: tripalmitoyl glycerol standards.

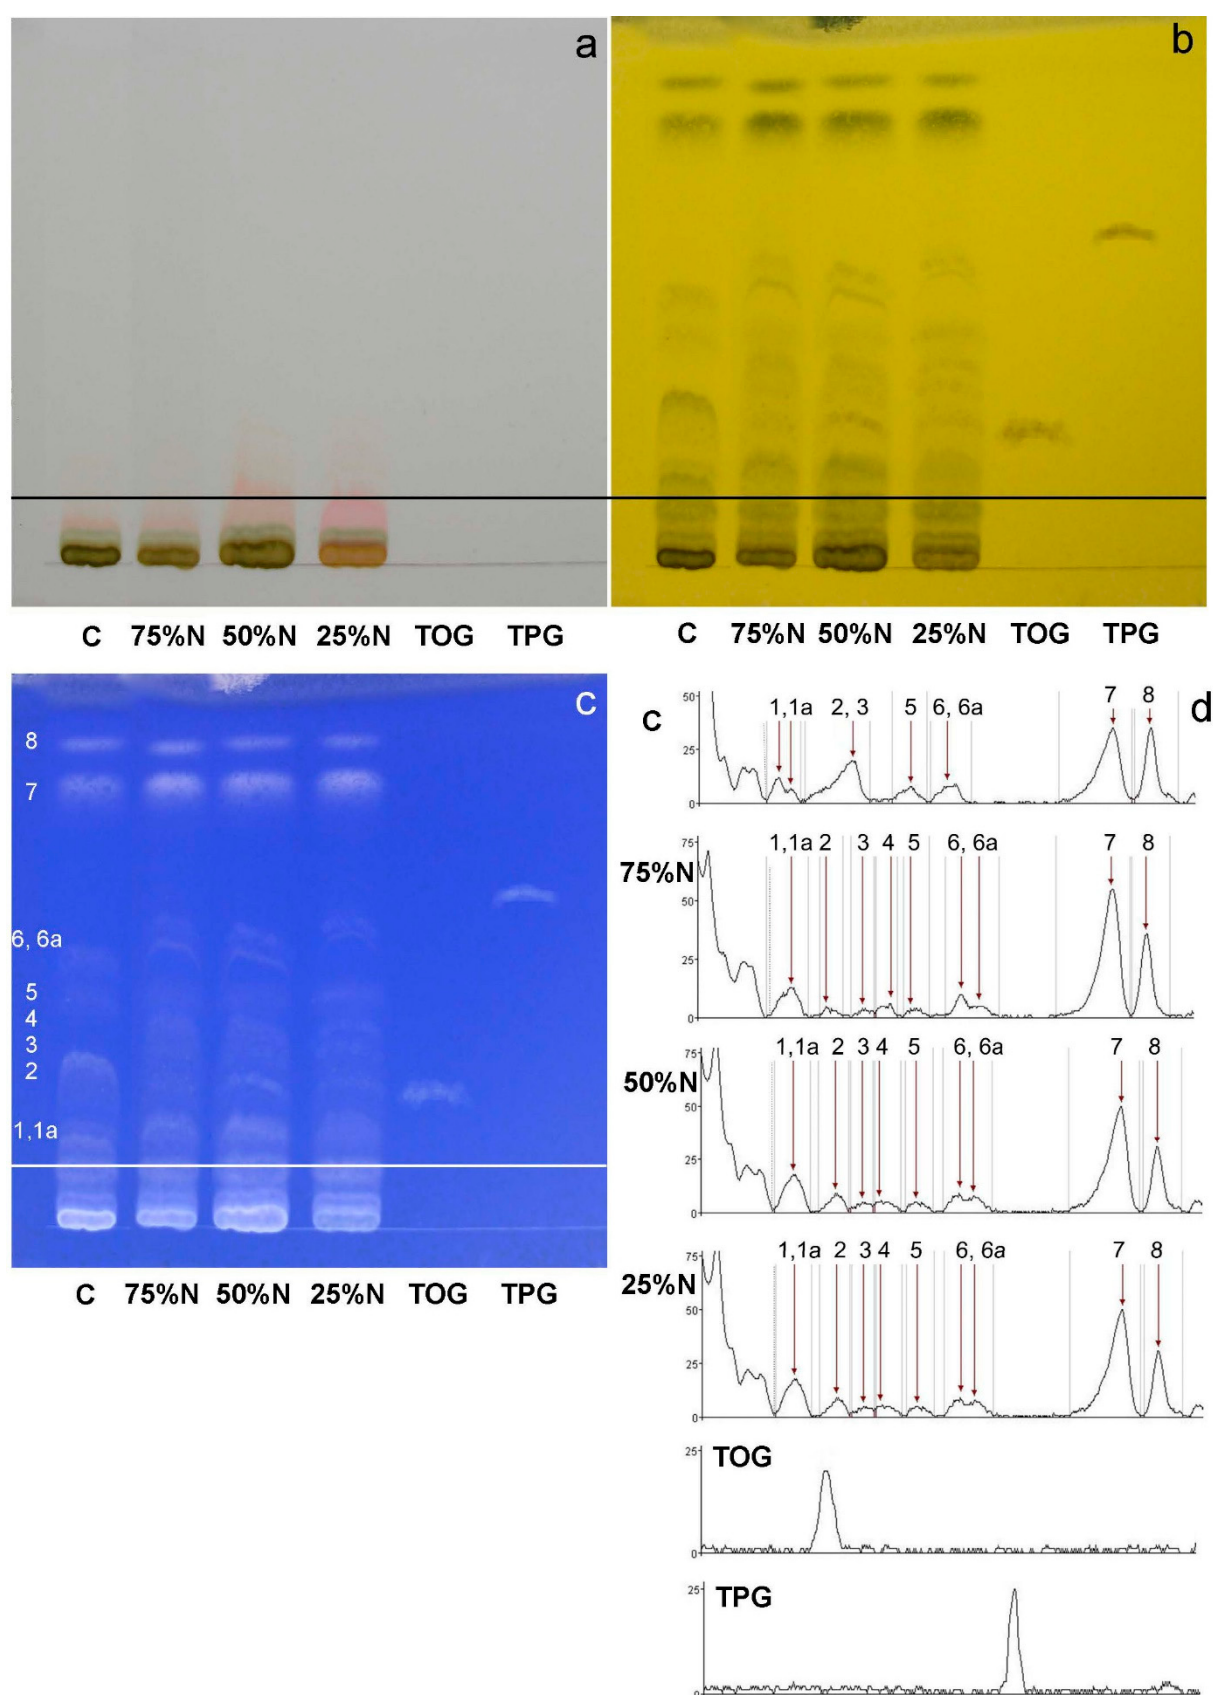

**Figure S3.** Preliminary analysis of the lipid content of *Monoraphidium pusillum* control (C) and nitrate depleted (75–25% N) cultures from the tank reactor by thin layer chromatography. (a) the TLC plate after the run; (b) the TLC plate after development; (c) the negative image of the

developed TLC plate created for pattern analysis; (**d**) the peaks found by using CpAtlas 2.0 software. 1–8: the separated bands (peaks); TOG: trioleil glycerol and TPG: tripalmitoyl glycerol standards.
